# Supplementary material for: Optimization of Sonotrode Ultrasonic-Assisted Extraction of Proanthocyanidins from Brewers’ Spent Grains
Source: PubMed Central journal article supplement (PMC6721779; doi:10.3390/antiox8080282), 2019-08-06

Figure S1

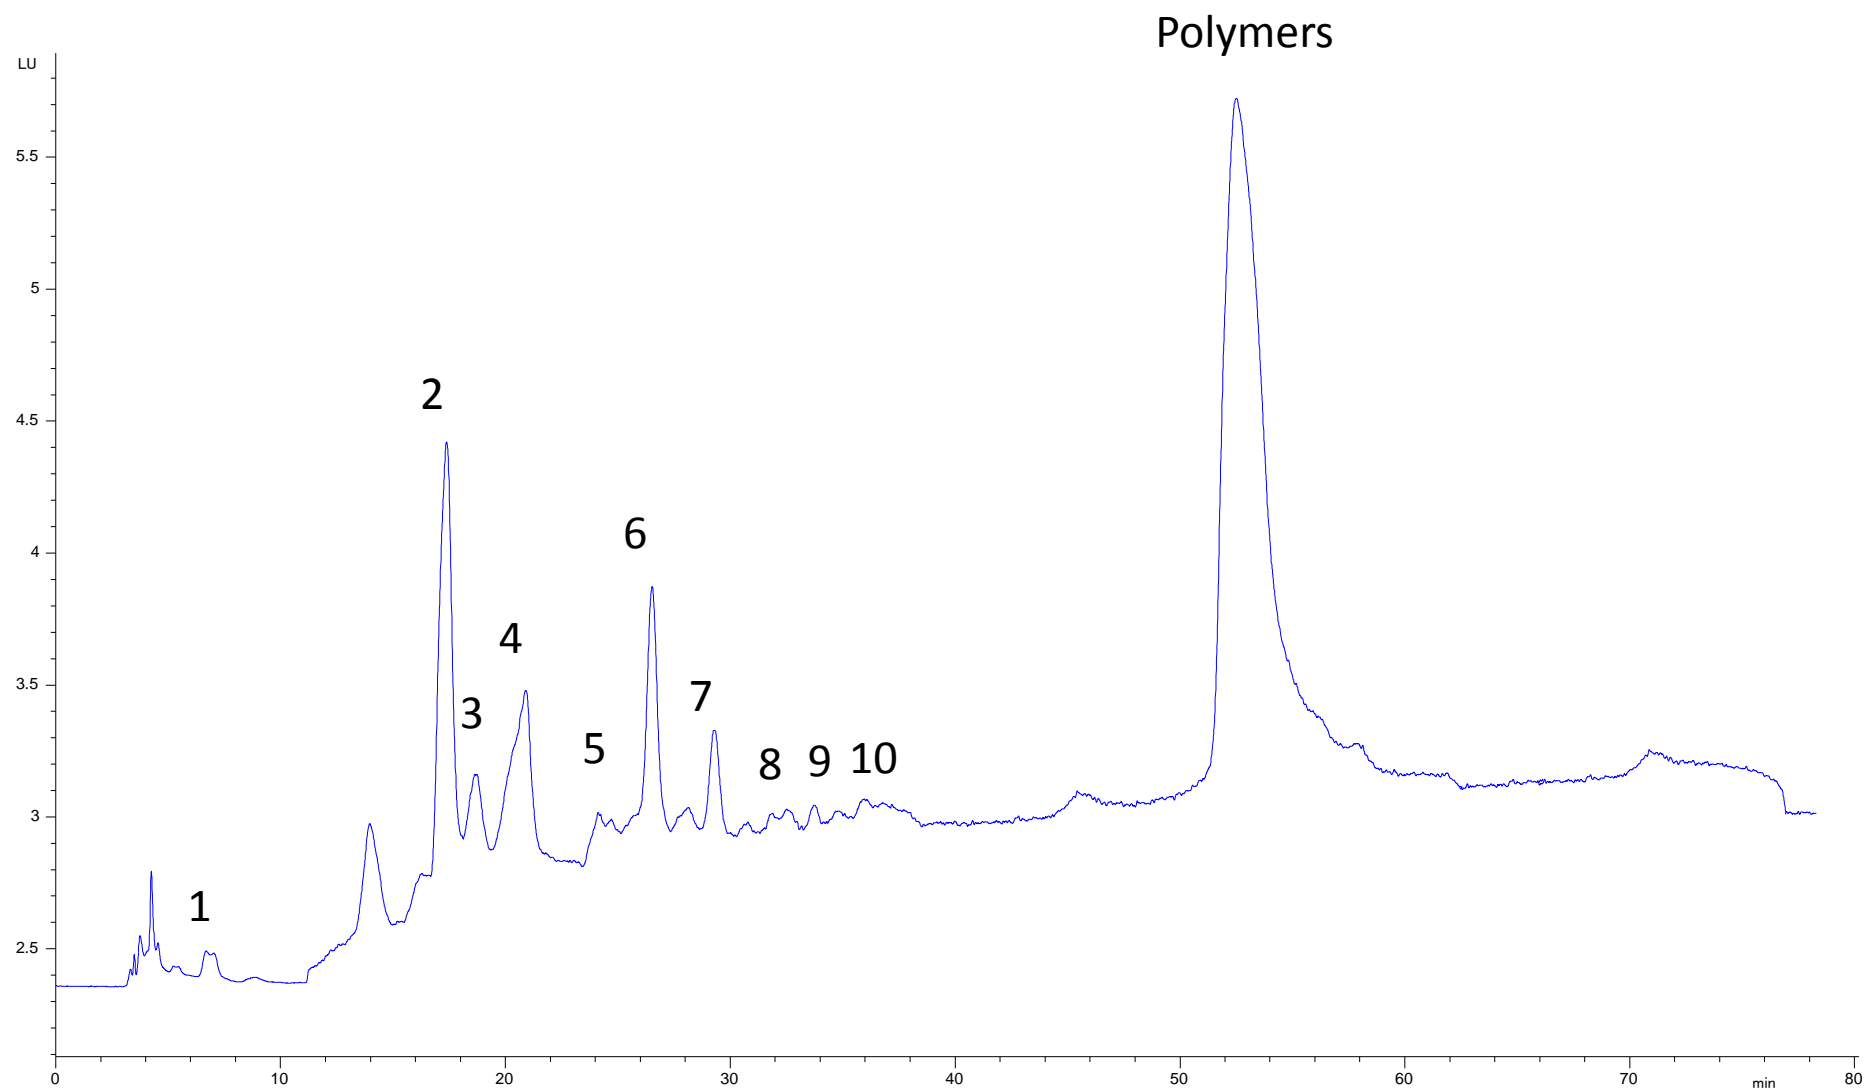

Supplement: antioxidants-08-00282-s001.pdf [file antioxidants-08-00282-s001.pdf]
